# Supplementary material for: Dihydrodinophysistoxin-1 Produced by Dinophysis norvegica in the Gulf of Maine, USA and Its Accumulation in Shellfish
Source: PubMed Central journal article supplement (PMC7551465; doi:10.3390/toxins12090533), 2020-08-20
Supplement: toxins-12-00533-s001.pdf [file toxins-12-00533-s001.pdf]

# Supplementary Materials: Dihydrodinophysistoxin-1 Produced by *Dinophysis norvegica* in the Gulf of Maine, USA and Its Accumulation in Shellfish

Jonathan R. Deeds, Whitney L. Stutts, Mary Dawn Celiz, Jill MacLeod, Amy E. Hamilton, Bryant J. Lewis, David W. Miller, Kohl Kanwit, Juliette L. Smith, David M. Kulis, Pearse McCarron, Carlton D. Rauschenberg, Craig A. Burnell, Stephen D. Archer, Jerry Borchert and Shelley K. Lankford

**Table S1.** Sampling site coordinates for shellfish and phytoplankton samples collected during the 2016 *Dinophysis norvegica* bloom depicted in Figures 1 and 2.

|                       | Map Number | Sampling Site          | Latitude  | Longitude  |
|-----------------------|------------|------------------------|-----------|------------|
| <b>Figure 1</b>       | 1          | Stinson Neck Causeway  | 44.21074  | -68.59489  |
|                       | 2          | Oak Point              | 44.44718  | -68.3323   |
|                       | 3          | Pretty March Harbor    | 44.33965  | -68.41552  |
|                       | 4          | Trenton Sea Plane Ramp | 44.442443 | -68.35756  |
|                       | 5          | Googins Ledge          | 44.447898 | -68.268982 |
|                       | 6          | Bar Harbor             | 44.39342  | -68.20833  |
|                       | 7          | Bar Harbor             | 44.39342  | -68.20833  |
|                       | 8          | Raccoon Cove           | 44.47093  | -68.27944  |
|                       | 9          | Lumbos Hole            | 43.79553  | -69.94557  |
|                       | 10         | Lumbos Hole            | 43.79553  | -69.94557  |
| <b>Figure 1&amp;2</b> |            | Lincolnville           | 44.28237  | -69.0074   |
|                       |            | Searsport              | 44.46035  | -68.8829   |
|                       |            | Dice Head              | 44.38107  | -68.8197   |
|                       |            | Eggemoggin Reach       | 44.2908   | -68.6926   |
|                       |            | Blue Hill Falls        | 44.37713  | -68.5612   |
|                       |            | Flye Point             | 44.25945  | -68.5195   |
|                       |            | Lamoine State Park     | 44.45125  | -68.2999   |
|                       |            | Salsbury Cove          | 44.43248  | -68.2852   |
|                       | Waukeag    | 44.47156               | -68.184   |            |

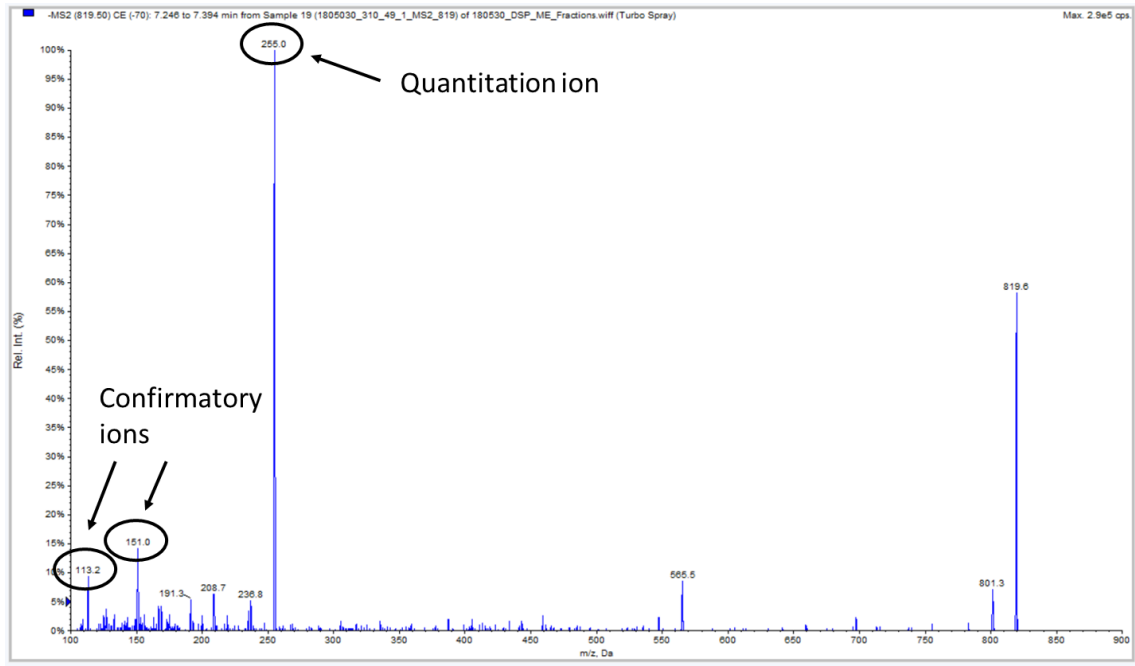

**Figure S1.** MS/MS spectrum of  $m/z$  819.5 peak detected in the 26–27 min fraction from the bioactivity guided fractionation extract of mussel (*Mytilus edulis*) collected during 2016 *Dinophysis norvegica* bloom in the central coast of the Gulf of Maine, USA.

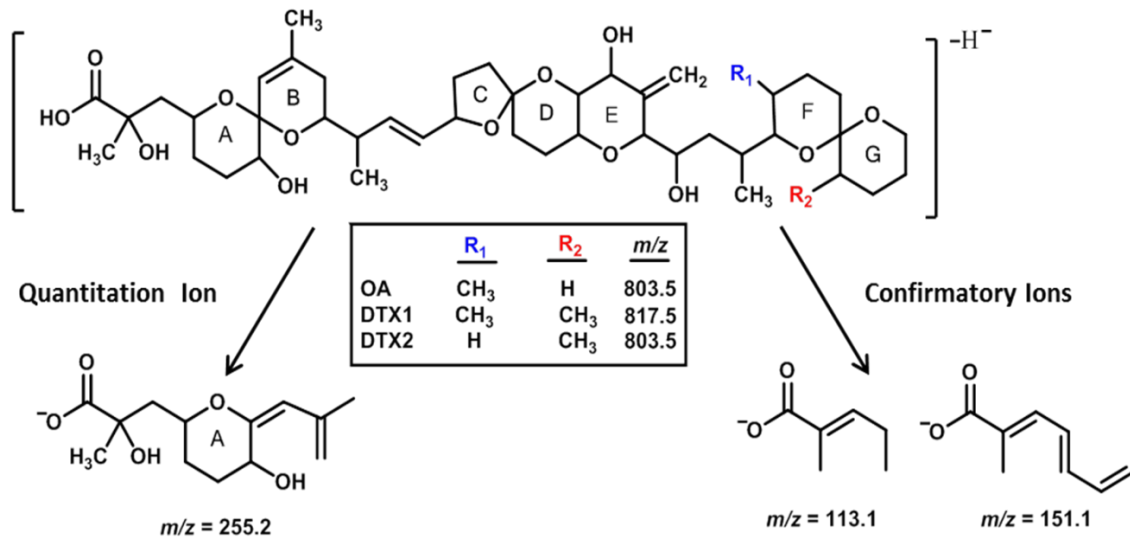

**Figure S2.** Structure of precursor ions and proposed product ion structures for okadaic acid (OA), dinophysistoxin 1 (DTX1), and dinophysistoxin 2 (DTX2).
